# Supplementary material for: PalVol v1: A proxy-based semi-stochastic ensemble reconstruction of volcanic stratospheric sulfur injection for the last glacial cycle (130,000–50 BP)
Source: Copernicus journal article supplement (doi:10.5194/essd-2023-103), 2023-05-26
Supplement: Supplementary file [file essd-2023-103-CC1-supplement.pdf]

I would like to add a short comment to this paper. In the absence of a continuous dataset of stratospheric volcanic sulfur emission and aerosol optical properties datasets prior to 11,500 years BP, I think it is a good idea to get comparable information from a synthetic product that takes into account ice core data but also tephra data from proximal deposits. I also acknowledge, that you are emphasizing inherent limitations of this synthetic product (e.g. comparably large error bars for age and strength of VSSI), and suggest to use or combine with, where possible, more precise data derived from ice-core records (Lin et al., 2022; Sigl et al., 2022; Toohey and Sigl, 2017). However, user of the dataset will likely employ it for many purposes, including linking the eruption record to rapid climate change, extreme events and societal collapse. A lot of progress has been achieved in the past decade regarding the dating of past eruptions using for example new-generation ice-core analyses or annual-resolution radiocarbon analyses. The LaMEVE database which forms the backbone of the PalVol v1 reconstruction, however, was built over a decade ago (Crowweller et al., 2012), and represents an earlier state of research, which has since been modified or refined many times.

Upon noting numerous eruption ages in Table A1 which differ from what is currently considered the best estimates, I have downloaded the LaMEVE eruption catalogue (<https://www2.bgs.ac.uk/vogripa/view/controller.cfc?method=lameve>) and critically assessed the dating of past eruptions in this dataset against revised age estimates published since. My analysis is incomplete and biased towards Late Glacial, Holocene and Common Era eruptions. Dating errors are considered to represent  $2\sigma$  uncertainties unless stated otherwise.

| Volcano                                          | Date (PALVOL)           | Date (revised)                       | Method for revision                     | References                                    |
|--------------------------------------------------|-------------------------|--------------------------------------|-----------------------------------------|-----------------------------------------------|
| Changbaishan                                     | 942 ( $\pm 4$ ) CE      | Nov 946 CE                           | Dendrochronology, ice core, radiocarbon | (Oppenheimer et al., 2017)                    |
| Katla (Eldgjá)                                   | 934 ( $\pm 2$ ) CE      | 939 CE                               | Documentary, ice core                   | (Oppenheimer et al., 2018; Sigl et al., 2015) |
| Bárdarbunga (Vatnaöldur)                         | 870 CE                  | 877 ( $\pm 1$ ) CE                   | Ice core                                | (Plunkett et al., 2023)                       |
| Churchill (White River Ash, eastern lobe (WRAe)) | 847 ( $\pm 1$ ) CE      | 853 ( $\pm 1$ ) CE                   | Ice core                                | (Mackay et al., 2022)                         |
| Ilopango (TBJ)                                   | 450 ( $\pm 30$ ) CE     | 431 ( $\pm 2$ ) CE                   | Ice core                                | (Smith et al., 2020)                          |
| Okmok II                                         | 76 BCE                  | 43 BCE                               | Ice core, dendroclimatology             | (McConnell et al., 2020)                      |
| Santorini                                        | 1610 ( $\pm 14$ ) BCE   | 1609–1560 BCE (95.4% probability)    | Radiocarbon, dendrochronology           | (Manning, 2022)                               |
| Aniakchak II                                     | 1645 ( $\pm 10$ ) BCE   | 1628 ( $\pm 1$ ) BCE                 | Ice core, dendroclimatology             | (Pearson et al., 2022)                        |
| Laacher See                                      | 12,916 BP               | 13,006 ( $\pm 9$ ) BP                | Radiocarbon, dendrochronology           | (Reinig et al., 2021)                         |
| Taupō (Oruanui)                                  | 27,100 ( $\pm 960$ ) BP | 25,319 ( $\pm 250$ ) BP              | Ice core                                | (Dunbar et al., 2017; Sigl et al., 2016)      |
|                                                  |                         | 25,335–25,800 BP (95.4% probability) | Radiocarbon                             | (Muscheler et al., 2020)                      |

I invite the authors of this paper to address my comments. I suggest that these amendments could be made in the corresponding tables of this manuscript, providing a basis for updating the PalVol reconstruction in its next iteration. You could also mention in this manuscript that there is a floating continuous volcanic forcing record for the time period 12.8-13.2 ka BP, aimed to support transient model simulations for the Younger Dryas inception (Abbott et al., 2021).

## REFERENCES:

- Abbott, P. M., Niemeier, U., Timmreck, C., Riede, F., McConnell, J. R., Severi, M., Fischer, H., Svensson, A., Toohey, M., Reinig, F., and Sigl, M.: Volcanic climate forcing preceding the inception of the Younger Dryas: Implications for tracing the Laacher See eruption, *Quaternary Sci Rev*, 274, 2021.
- Crosweller, H. S., Arora, B., Brown, S. K., Cottrell, E., Deligne, N. I., Guerrero, N. O., Hobbs, L., Kiyosugi, K., Loughlin, S. C., Lowndes, J., Nayembil, M., Siebert, L., Sparks, R. S. J., Takarada, S., and Venzke, E.: Global database on large magnitude explosive volcanic eruptions (LaMEVE), *Journal of Applied Volcanology*, 1, 4, 2012.
- Dunbar, N. W., Iverson, N. A., Van Eaton, A. R., Sigl, M., Alloway, B. V., Kurbatov, A. V., Mastin, L. G., McConnell, J. R., and Wilson, C. J. N.: New Zealand supereruption provides time marker for the Last Glacial Maximum in Antarctica, *Sci Rep-Uk*, 7, 2017.
- Lin, J., Svensson, A., Hvidberg, C. S., Lohmann, J., Kristiansen, S., Dahl-Jensen, D., Steffensen, J. P., Rasmussen, S. O., Cook, E., Kjær, H. A., Vinther, B. M., Fischer, H., Stocker, T., Sigl, M., Bigler, M., Severi, M., Traversi, R., and Mulvaney, R.: Magnitude, frequency and climate forcing of global volcanism during the last glacial period as seen in Greenland and Antarctic ice cores (60–9ka BP), *Clim. Past*, 18, 485-506, 2022.
- Mackay, H., Plunkett, G., Jensen, B. J. L., Aubry, T. J., Corona, C., Kim, W. M., Toohey, M., Sigl, M., Stoffel, M., Anchukaitis, K. J., Raible, C., Bolton, M. S. M., Manning, J. G., Newfield, T. P., Di Cosmo, N., Ludlow, F., Kostick, C., Yang, Z., Coyle McClung, L., Amesbury, M., Monteath, A., Hughes, P. D. M., Langdon, P. G., Charman, D., Booth, R., Davies, K. L., Blundell, A., and Swindles, G. T.: The 852/3 CE Mount Churchill eruption: examining the potential climatic and societal impacts and the timing of the Medieval Climate Anomaly in the North Atlantic region, *Clim. Past*, 18, 1475-1508, 2022.
- Manning, S. W.: Second Intermediate Period date for the Thera (Santorini) eruption and historical implications, *Plos One*, 17, 2022.
- McConnell, J. R., Sigl, M., Plunkett, G., Burke, A., Kim, W. M., Raible, C. C., Wilson, A. I., Manning, J. G., Ludlow, F., Chellman, N. J., Innes, H. M., Yang, Z., Larsen, J. F., Schaefer, J. R., Kipfstuhl, S., Mojtabavi, S., Wilhelms, F., Opel, T., Meyer, H., and Steffensen, J. P.: Extreme climate after massive eruption of Alaska's Okmok volcano in 43 BCE and effects on the late Roman Republic and Ptolemaic Kingdom, *P Natl Acad Sci USA*, 117, 15443-15449, 2020.
- Muscheler, R., Adolphi, F., Heaton, T. J., Bronk Ramsey, C., Svensson, A., van der Plicht, J., and Reimer, P. J.: Testing and Improving the IntCal20 Calibration Curve with Independent Records, *Radiocarbon*, 62, 1079-1094, 2020.
- Oppenheimer, C., Orchard, A., Stoffel, M., Newfield, T. P., Guillet, S., Corona, C., Sigl, M., Di Cosmo, N., and Buntgen, U.: The Eldgja eruption: timing, long-range impacts and influence on the Christianisation of Iceland, *Climatic Change*, 147, 369-381, 2018.

- Oppenheimer, C., Wacker, L., Xu, J., Galvan, J. D., Stoffel, M., Guillet, S., Corona, C., Sigl, M., Di Cosmo, N., Hajdas, I., Pan, B., Breuker, R., Schneider, L., Esper, J., Fei, J., Hammond, J. O. S., and Büntgen, U.: Multi-proxy dating the 'Millennium Eruption' of Changbaishan to late 946 CE, *Quaternary Sci Rev*, 158, 164-171, 2017.
- Pearson, C., Sigl, M., Burke, A., Davies, S., Kurbatov, A., Severi, M., Cole-Dai, J., Innes, H., Albert, P. G., and Helmick, M.: Geochemical ice-core constraints on the timing and climatic impact of Aniakchak II (1628 BCE) and Thera (Minoan) volcanic eruptions, *PNAS Nexus*, doi: 10.1093/pnasnexus/pgac048, 2022.
- Plunkett, G., Sigl, M., McConnell, J. R., Pilcher, J. R., and Chellman, N. J.: The significance of volcanic ash in Greenland ice cores during the Common Era, *Quaternary Sci Rev*, 301, 107936, 2023.
- Reinig, F., Wacker, L., Jöris, O., Oppenheimer, C., Guidobaldi, G., Nievergelt, D., Adolphi, F., Cherubini, P., Engels, S., Esper, J., Land, A., Lane, C., Pfanz, H., Remmele, S., Sigl, M., Sookdeo, A., and Büntgen, U.: Precise date for the Laacher See eruption synchronizes the Younger Dryas, *Nature*, 595, 66-69, 2021.
- Sigl, M., Fudge, T. J., Winstrup, M., Cole-Dai, J., Ferris, D., McConnell, J. R., Taylor, K. C., Welten, K. C., Woodruff, T. E., Adolphi, F., Bisiaux, M., Brook, E. J., Buizert, C., Caffee, M. W., Dunbar, N. W., Edwards, R., Geng, L., Iverson, N., Koffman, B., Layman, L., Maselli, O. J., McGwire, K., Muscheler, R., Nishiizumi, K., Pasteris, D. R., Rhodes, R. H., and Sowers, T. A.: The WAIS Divide deep ice core WD2014 chronology - Part 2: Annual-layer counting (0-31 ka BP), *Clim Past*, 12, 769-786, 2016.
- Sigl, M., Toohey, M., McConnell, J. R., Cole-Dai, J., and Severi, M.: Volcanic stratospheric sulfur injections and aerosol optical depth during the Holocene (past 11 500 years) from a bipolar ice-core array, *Earth System Science Data*, 14, 3167-3196, 2022.
- Sigl, M., Winstrup, M., McConnell, J. R., Welten, K. C., Plunkett, G., Ludlow, F., Büntgen, U., Caffee, M., Chellman, N., Dahl-Jensen, D., Fischer, H., Kipfstuhl, S., Kostick, C., Maselli, O. J., Mekhaldi, F., Mulvaney, R., Muscheler, R., Pasteris, D. R., Pilcher, J. R., Salzer, M., Schupbach, S., Steffensen, J. P., Vinther, B. M., and Woodruff, T. E.: Timing and climate forcing of volcanic eruptions for the past 2,500 years, *Nature*, 523, 543-549, 2015.
- Smith, V. C., Costa, A., Aguirre-Diaz, G., Pedrazzi, D., Scifo, A., Plunkett, G., Poret, M., Tournigand, P. Y., Miles, D., Dee, M. W., McConnell, J. R., Sunye-Puchol, I., Harris, P. D., Sigl, M., Pilcher, J. R., Chellman, N., and Gutierrez, E.: The magnitude and impact of the 431 CE Tierra Blanca Joven eruption of Ilopango, El Salvador, *P Natl Acad Sci USA*, 117, 26061-26068, 2020.
- Toohey, M. and Sigl, M.: Volcanic stratospheric sulfur injections and aerosol optical depth from 500 BCE to 1900 CE, *Earth System Science Data*, 9, 809-831, 2017.
